# Supplementary material for: Poly(ionic liquid)s as phase splitting promoters in aqueous biphasic systems
Source: Royal Society of Chemistry journal article supplement (doi:10.1039/c5cp03521j), 2015-01-01
Supplement: c5cp03521j1.pdf [file c5cp03521j1.pdf]

# Supplementary Information

## Poly(ionic liquid)s as Phase Splitting Promoters in Aqueous Biphasic Systems

*Karen João,<sup>a,‡</sup> Liliana C. Tomé,<sup>a,‡</sup> Mehmet Isik,<sup>b</sup> David Mecerreyes,<sup>b,c</sup> and Isabel M. Marrucho<sup>\*a</sup>*

<sup>a</sup> Instituto de Tecnologia Química e Biológica António Xavier, Universidade Nova de Lisboa, Av. da República, 2780-157 Oeiras, Portugal.

<sup>b</sup> POLYMAT, Institute for Polymer Materials, University of the Basque Country UPV/EHU, Joxe Mari Korta Center, Avda. Tolosa 72, 20018 Donostia-San Sebastian, Spain.

<sup>c</sup> IKERBASQUE, Basque Foundation for Science, E-48011 Bilbao, Spain.

‡ Equally contributing authors

\* Corresponding author

Tel: +351 21 4469720

Fax: +351 21 4411277

E-mail: [imarrucho@itqb.unl.pt](mailto:imarrucho@itqb.unl.pt)

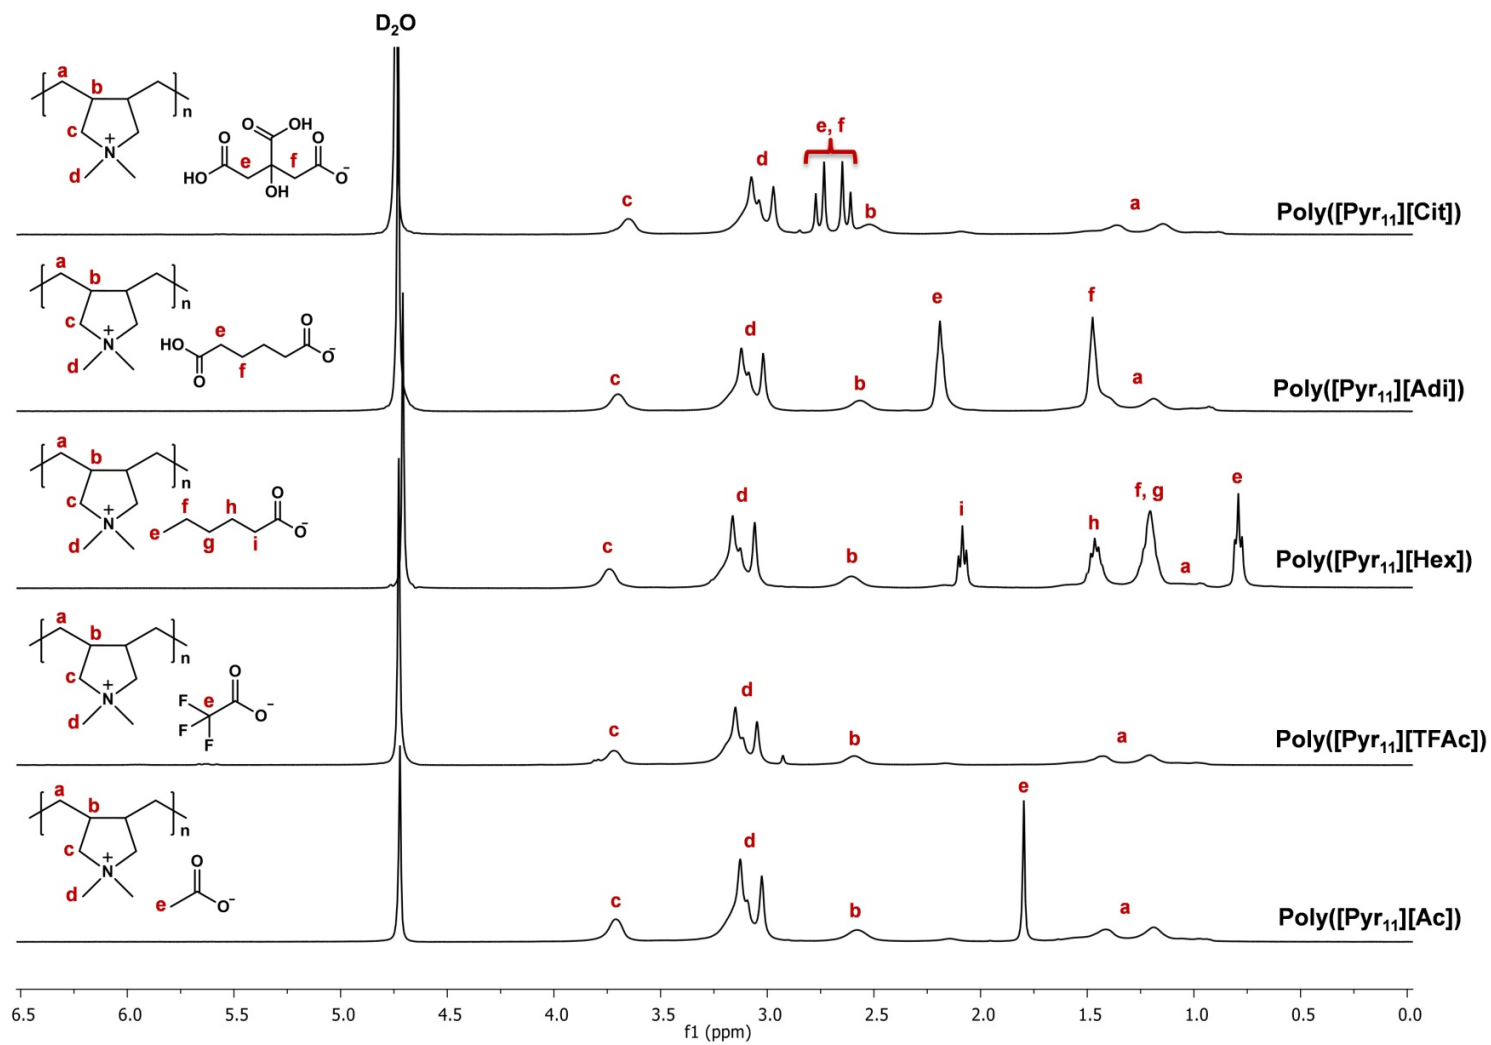

**Fig. S1**  $^1\text{H}$  – NMR spectra of the prepared pyrrolidinium-based PILs containing carboxylated counter-anions.

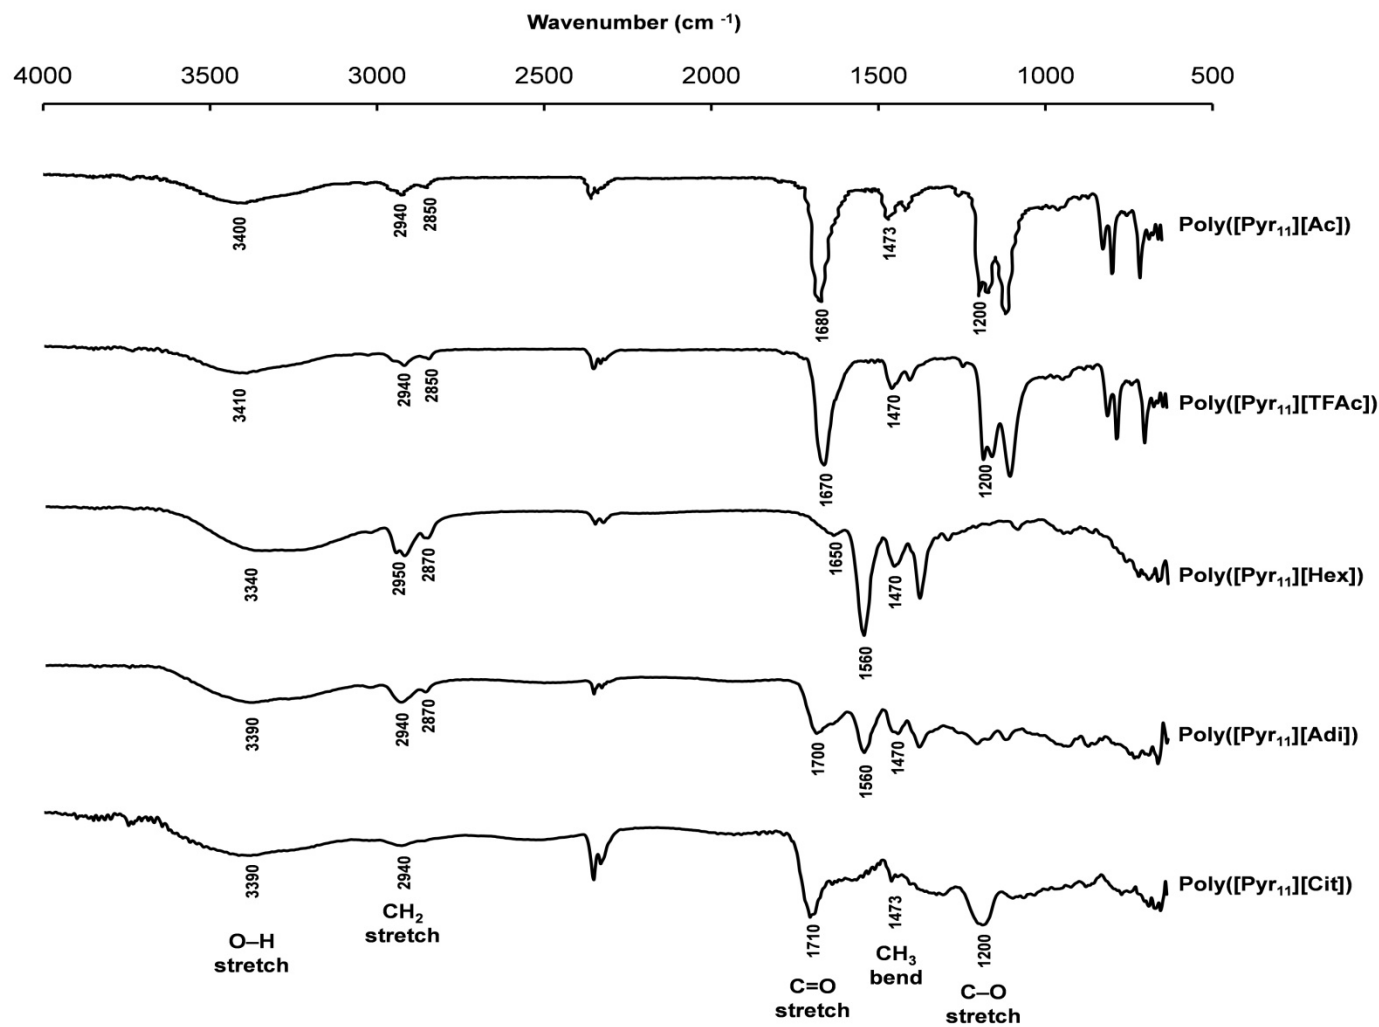

**Fig. S2** FTIR transmission spectra of the prepared pyrrolidinium-based PILs containing carboxylate counter-anions.

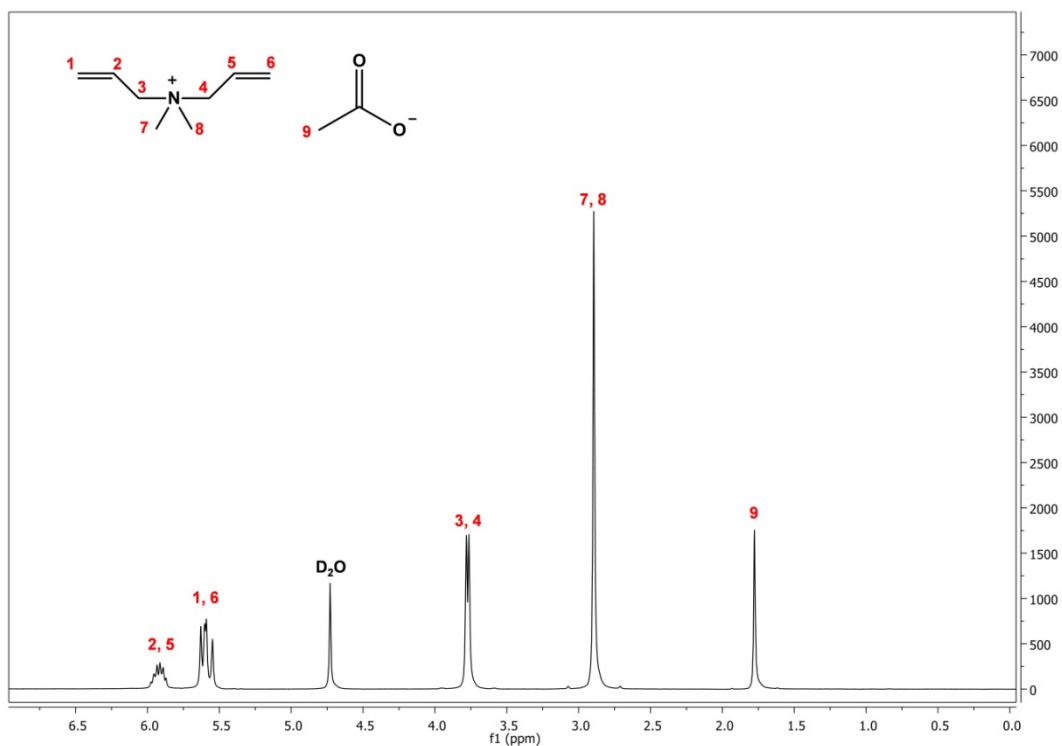

**Fig. S3** <sup>1</sup>H-NMR spectrum of diallyldimethylammonium acetate monomer in D<sub>2</sub>O.

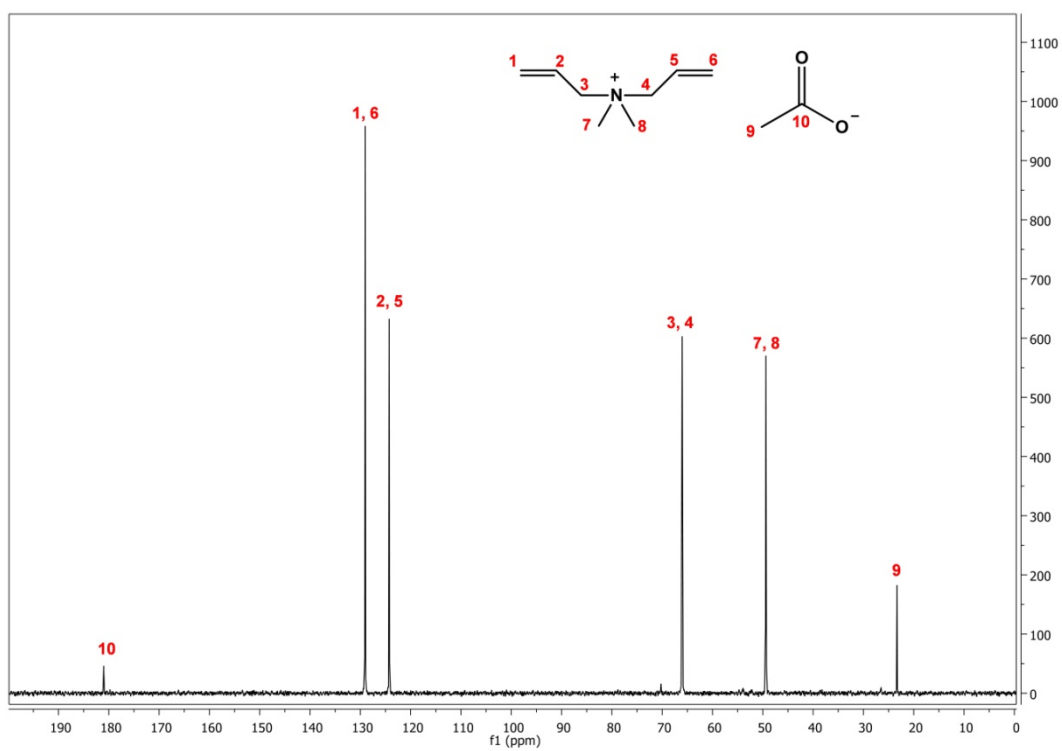

**Fig. S4** <sup>13</sup>C-NMR spectrum of diallyldimethylammonium acetate monomer in D<sub>2</sub>O.

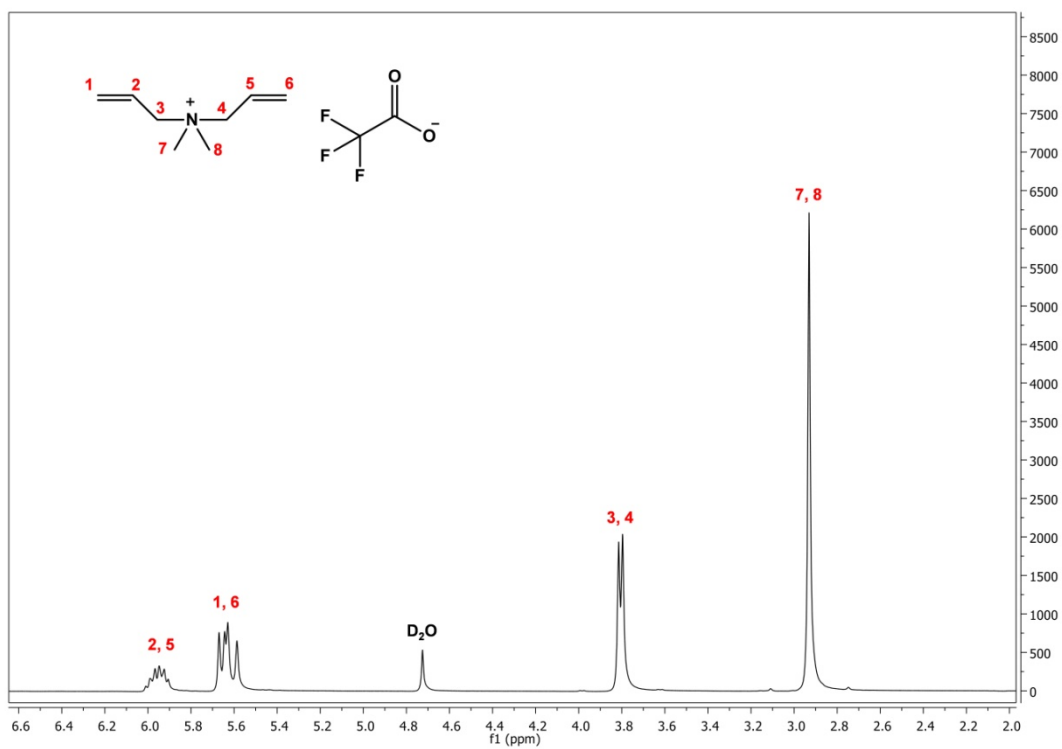

**Fig. S5**  $^1\text{H-NMR}$  spectrum of diallyldimethylammonium trifluoroacetate monomer in  $\text{D}_2\text{O}$ .

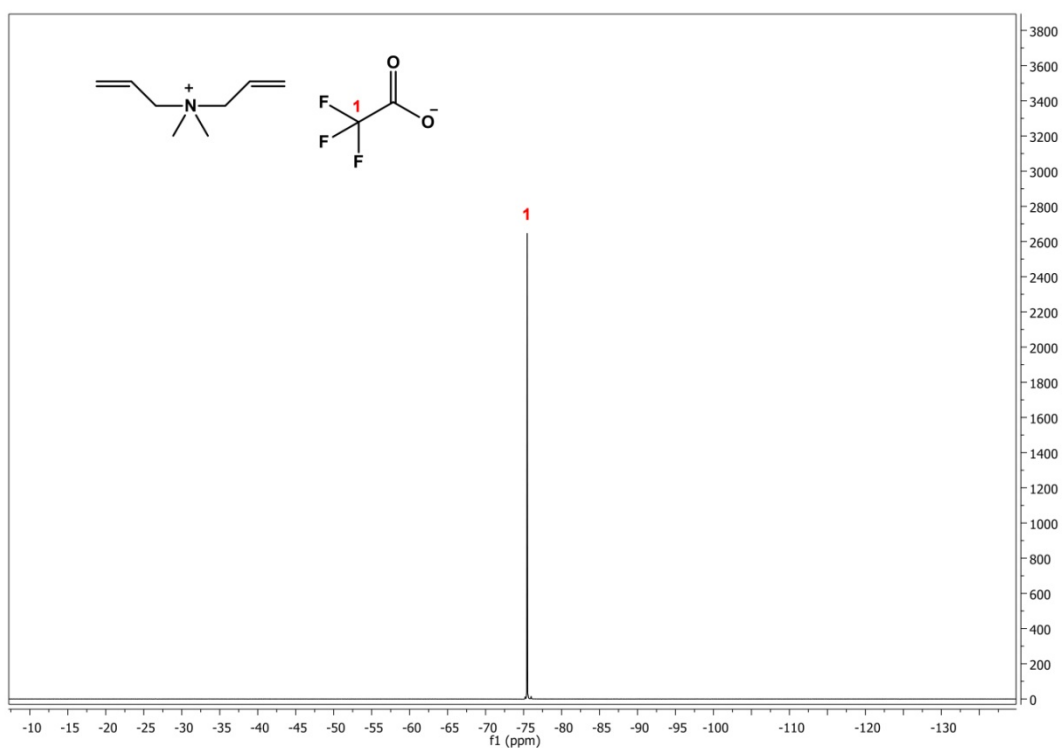

**Fig. S6**  $^{19}\text{F-NMR}$  spectrum of diallyldimethylammonium trifluoroacetate monomer in  $\text{D}_2\text{O}$ .

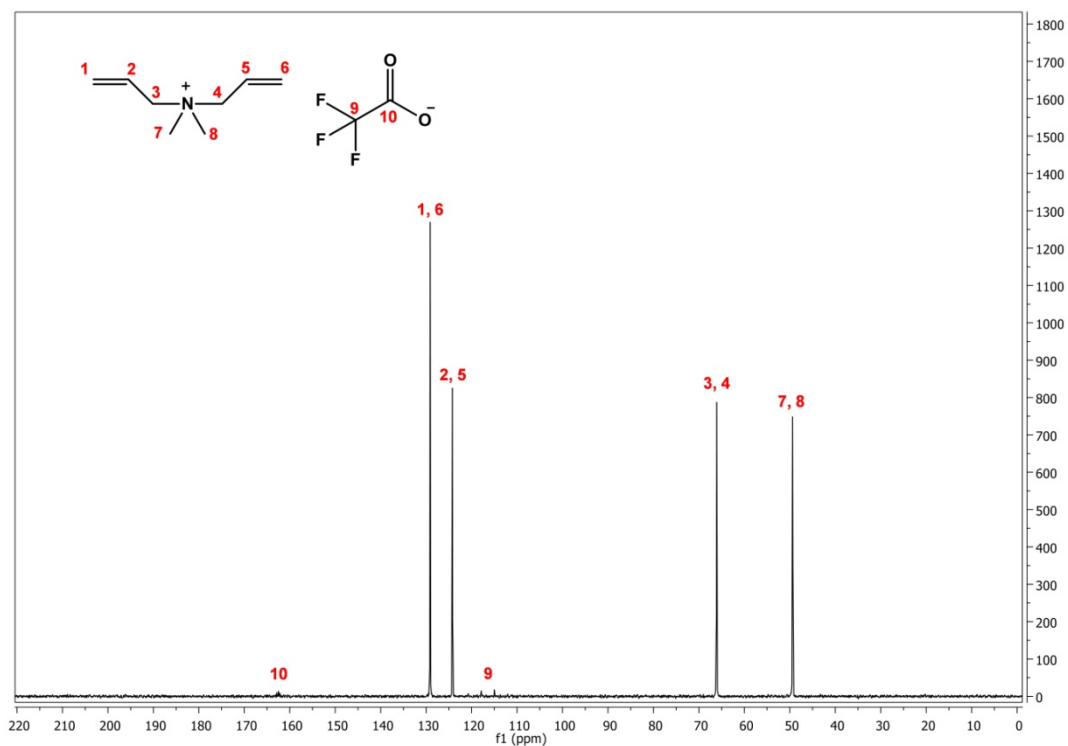

**Fig. S7**  $^{13}\text{C}$ -NMR spectrum of diallyldimethylammonium trifluoroacetate monomer in  $\text{D}_2\text{O}$ .

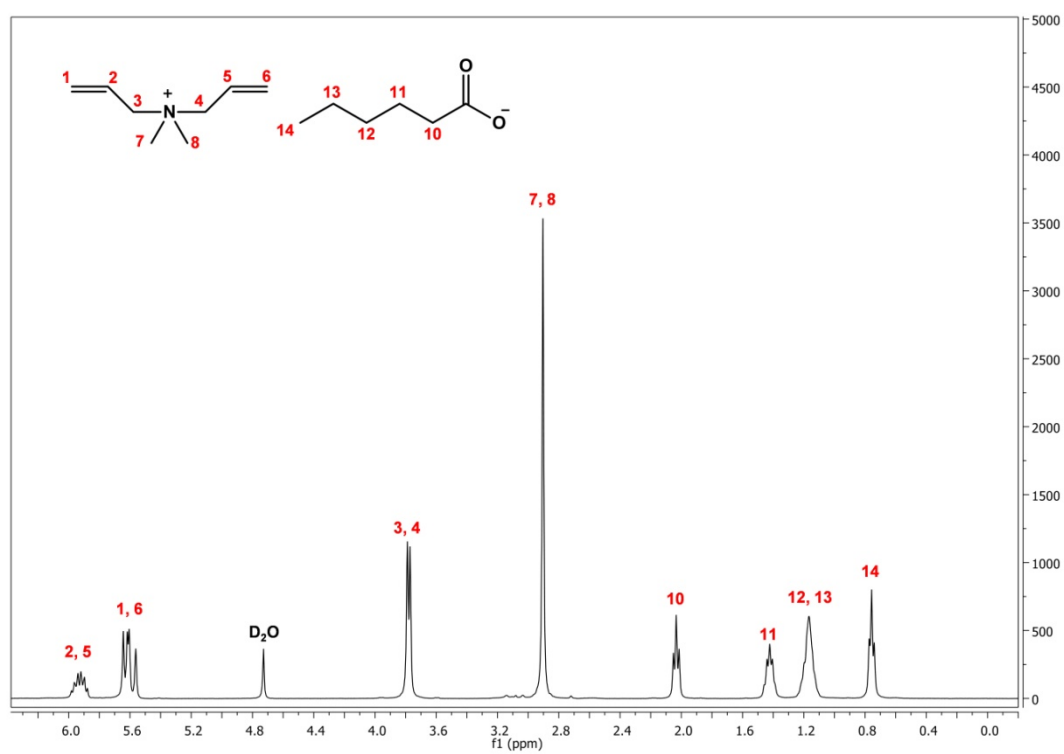

**Fig. S8**  $^1\text{H}$ -NMR spectrum of diallyldimethylammonium hexanoate monomer in  $\text{D}_2\text{O}$ .

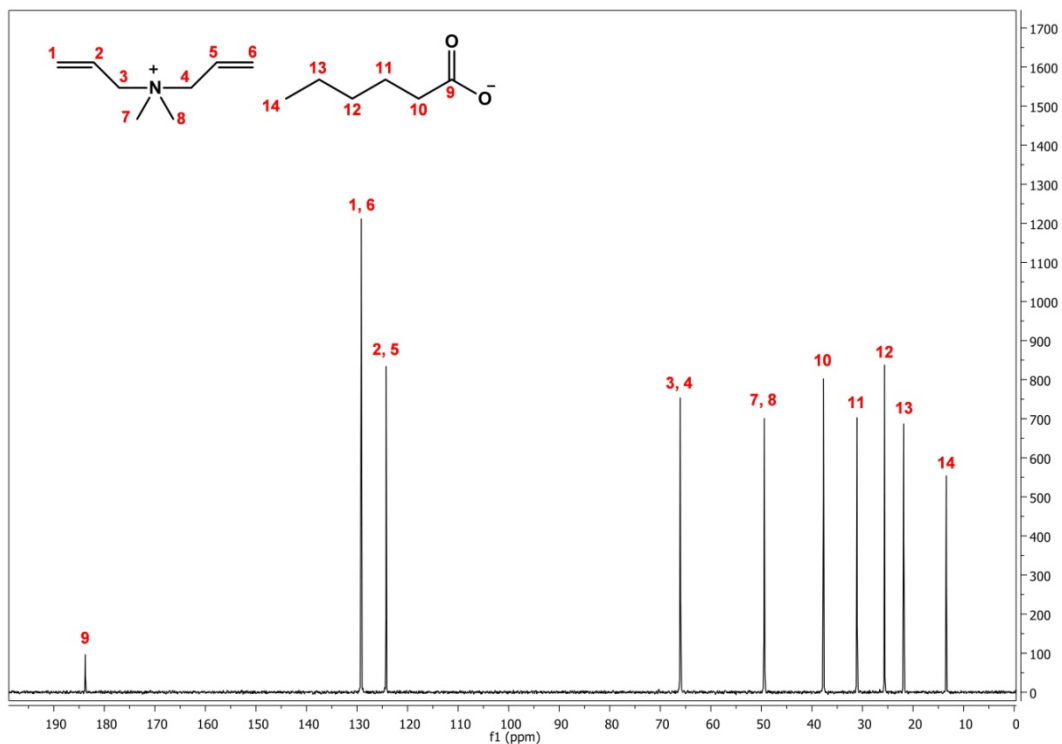

**Fig. S9**  $^{13}\text{C}$ -NMR spectrum of diallyldimethylammonium hexanoate monomer in  $\text{D}_2\text{O}$ .

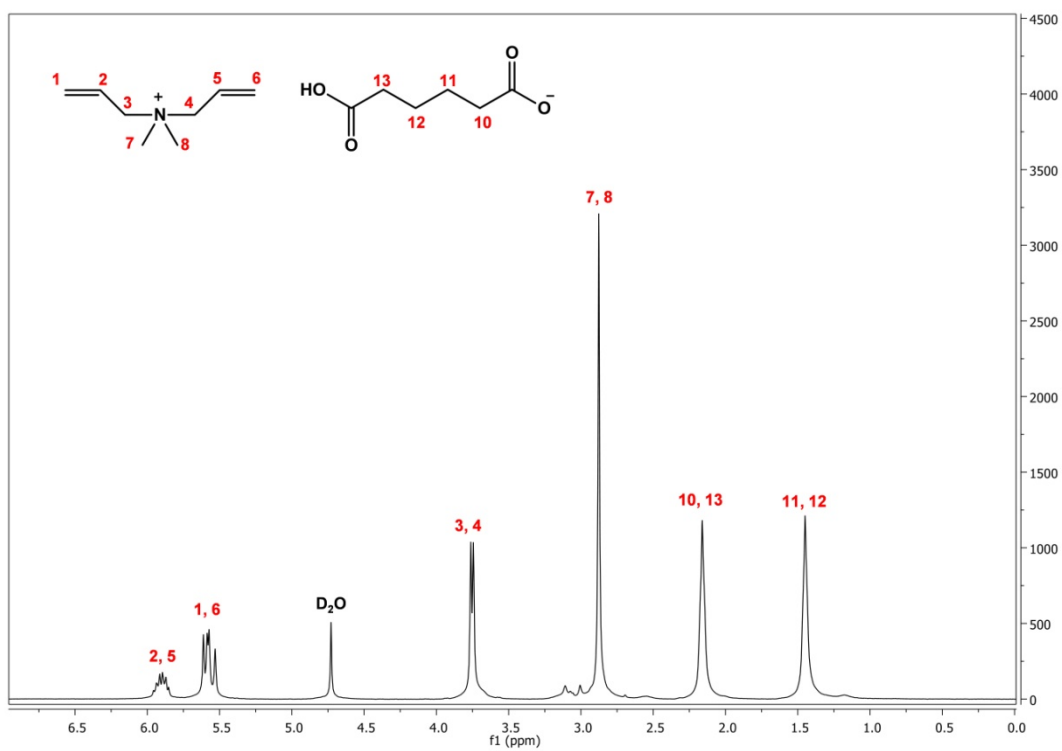

**Fig. S10**  $^1\text{H}$ -NMR spectrum of diallyldimethylammonium adipate monomer in  $\text{D}_2\text{O}$ .

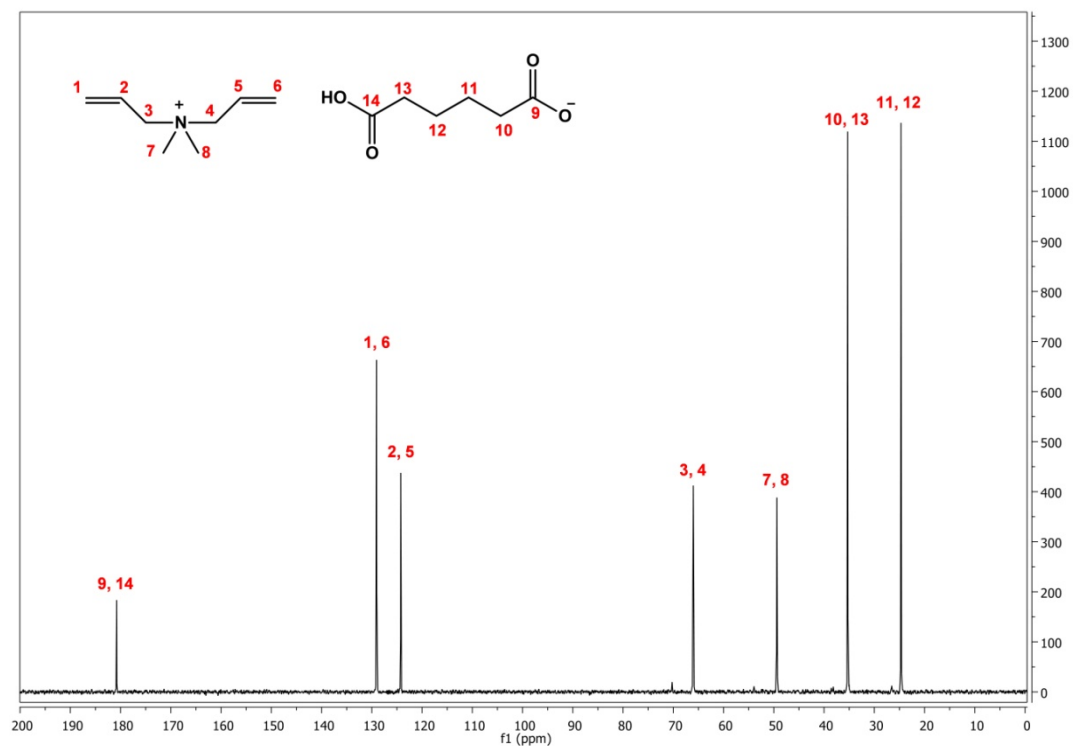

**Fig. S11**  $^{13}\text{C}$ -NMR spectrum of diallyldimethylammonium adipate monomer in  $\text{D}_2\text{O}$ .

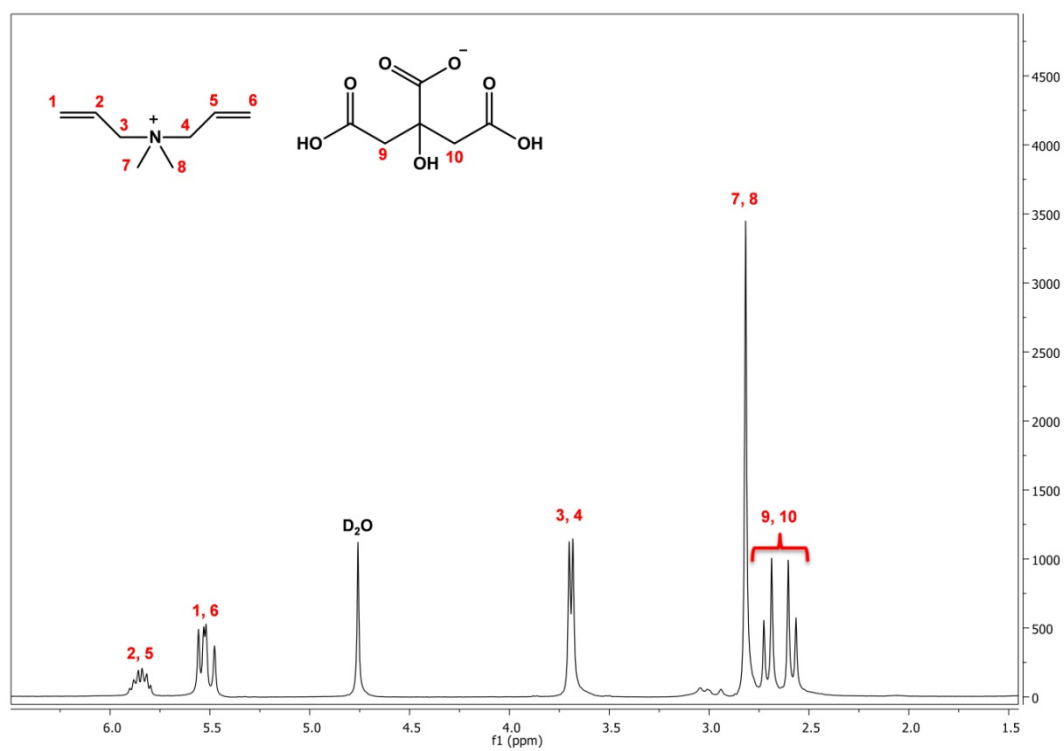

**Fig. S12**  $^1\text{H}$ -NMR spectrum of diallyldimethylammonium citrate monomer in  $\text{D}_2\text{O}$ .



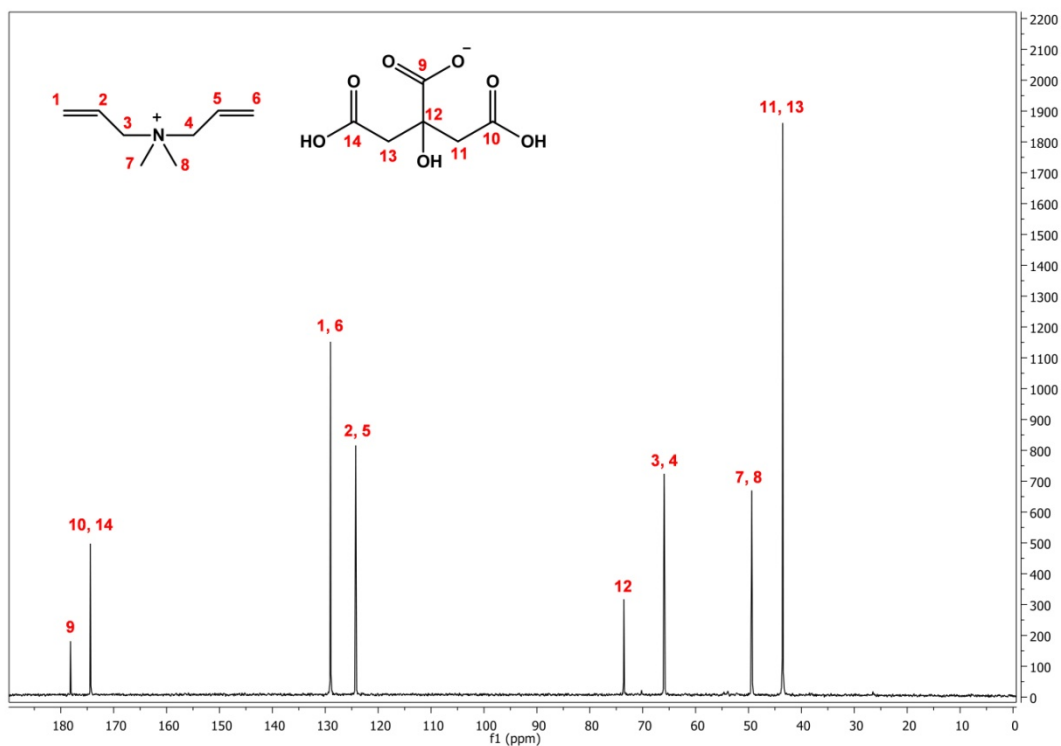

**Fig. S13**  $^{13}\text{C}$ -NMR spectrum of diallyldimethylammonium citrate monomer in  $\text{D}_2\text{O}$

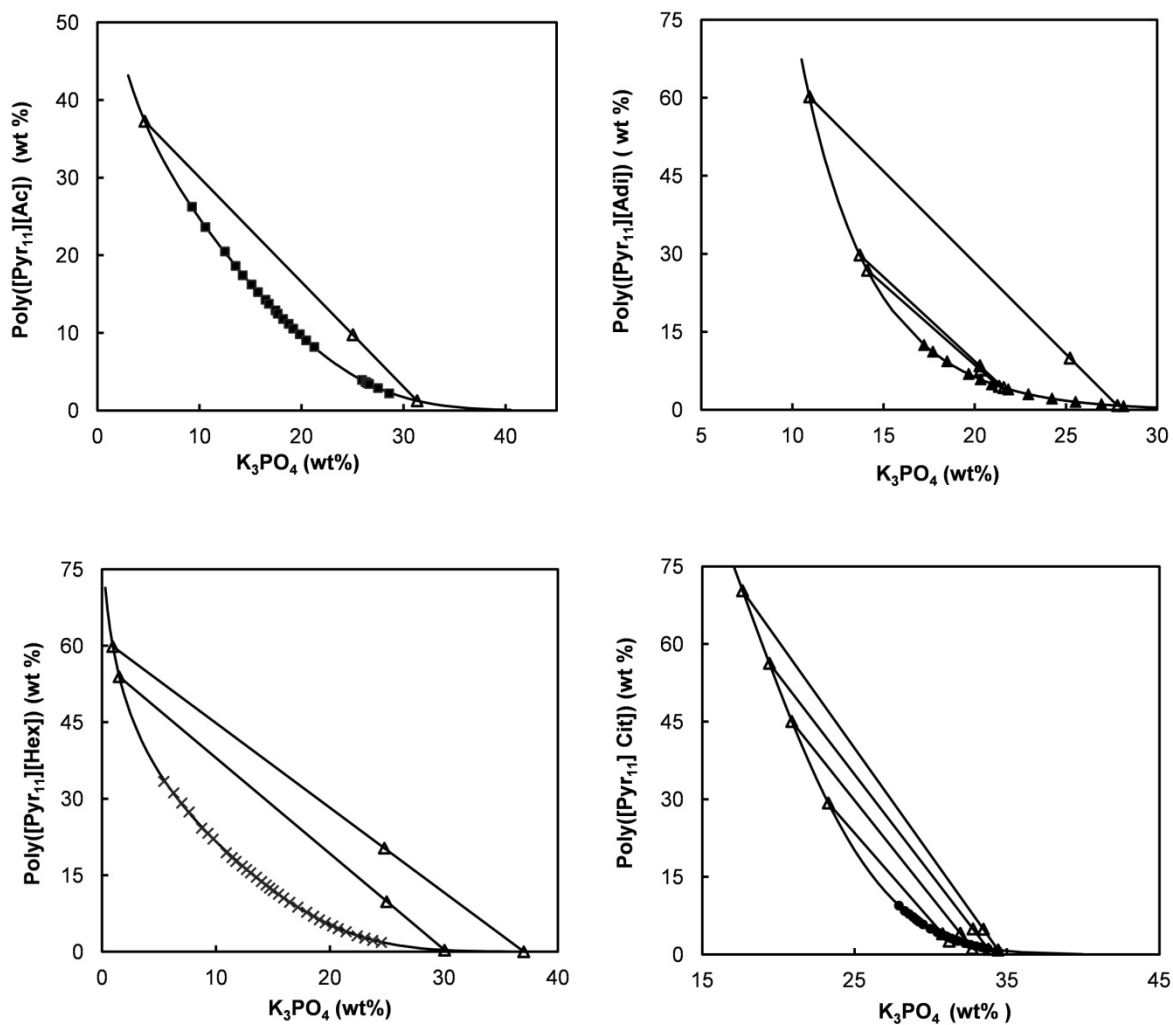

**Fig. S14** Phase diagrams and experimental tie-lines of the PIL + K<sub>3</sub>PO<sub>4</sub> + H<sub>2</sub>O ternary systems at 25 °C: TL data ( $\Delta$ ).

**Table S1.** Weight fraction data for the ternary systems composed of PIL (1) + K<sub>3</sub>PO<sub>4</sub> (2) + H<sub>2</sub>O (3) at 25 °C.

| Poly([Pyr <sub>11</sub> ][Ac])<br>M <sub>w</sub> = 52 kDa |                    | Poly([Pyr <sub>11</sub> ][TFAc])<br>M <sub>w</sub> = 41 kDa |                    | Poly([Pyr <sub>11</sub> ]Cl)<br>High M <sub>w</sub> (400–500 kDa) |                    |
|-----------------------------------------------------------|--------------------|-------------------------------------------------------------|--------------------|-------------------------------------------------------------------|--------------------|
| 100 w <sub>1</sub>                                        | 100 w <sub>2</sub> | 100 w <sub>1</sub>                                          | 100 w <sub>2</sub> | 100 w <sub>1</sub>                                                | 100 w <sub>2</sub> |
| 26.2596                                                   | 9.2460             | 20.1130                                                     | 9.0706             | 25.8046                                                           | 8.0396             |
| 23.6251                                                   | 10.5594            | 18.3199                                                     | 9.7905             | 23.6962                                                           | 9.1665             |
| 20.4992                                                   | 12.4717            | 17.1880                                                     | 10.3080            | 21.4650                                                           | 10.1486            |
| 18.6420                                                   | 13.5263            | 16.2908                                                     | 10.7877            | 20.1946                                                           | 10.7919            |
| 17.4376                                                   | 14.2218            | 15.6233                                                     | 11.0443            | 18.9313                                                           | 11.5523            |
| 16.2429                                                   | 15.0783            | 14.8718                                                     | 11.5248            | 17.5925                                                           | 12.2591            |
| 15.2695                                                   | 15.7040            | 13.9168                                                     | 11.8824            | 16.6004                                                           | 12.9244            |
| 14.2799                                                   | 16.4490            | 13.1502                                                     | 12.3178            | 15.8620                                                           | 13.3244            |
| 13.7514                                                   | 16.7815            | 12.4401                                                     | 12.7331            | 15.1564                                                           | 13.6620            |
| 12.9176                                                   | 17.4303            | 11.6786                                                     | 13.1785            | 13.9121                                                           | 14.5306            |
| 12.4770                                                   | 17.6629            | 10.8677                                                     | 13.6576            | 12.5483                                                           | 15.3530            |
| 11.8025                                                   | 18.1863            | 10.1428                                                     | 14.0940            | 11.3299                                                           | 16.1939            |
| 11.1769                                                   | 18.7167            | 9.2839                                                      | 14.7144            | 10.2933                                                           | 17.0193            |
| 10.5376                                                   | 19.1782            | 8.3619                                                      | 15.4104            | 9.3169                                                            | 17.7953            |
| 9.8251                                                    | 19.8267            | 7.6017                                                      | 16.0023            | 8.4428                                                            | 18.4450            |
| 9.0529                                                    | 20.4304            | 6.9327                                                      | 16.6163            | 7.7168                                                            | 19.1538            |
| 8.1961                                                    | 21.2268            | 6.2680                                                      | 17.2076            | 6.9568                                                            | 19.9035            |
| 3.9362                                                    | 25.9181            | 5.5884                                                      | 17.9142            | 6.4959                                                            | 20.4209            |
| 3.6874                                                    | 26.2579            | 4.9642                                                      | 18.5869            | 6.0738                                                            | 20.8780            |
| 3.5535                                                    | 26.4338            | 4.4495                                                      | 19.2114            | 5.6254                                                            | 21.3720            |
| 3.4284                                                    | 26.6076            | 3.9709                                                      | 19.8345            | 4.9988                                                            | 22.1552            |
| 2.8864                                                    | 27.4917            | 3.5277                                                      | 20.4825            | 4.3846                                                            | 22.9050            |
| 2.2169                                                    | 28.5805            | 3.0997                                                      | 21.1735            | 3.6505                                                            | 24.1190            |
| -                                                         | -                  | 2.6971                                                      | 21.8946            | 1.9116                                                            | 27.4357            |
| -                                                         | -                  | 2.2861                                                      | 22.7370            | -                                                                 | -                  |
| -                                                         | -                  | 1.8250                                                      | 23.8209            | -                                                                 | -                  |
| -                                                         | -                  | 1.3759                                                      | 25.1175            | -                                                                 | -                  |
| -                                                         | -                  | 1.0118                                                      | 26.4352            | -                                                                 | -                  |

| Poly([Pyr <sub>11</sub> ]Cl)        |                    | Poly([Pyr <sub>11</sub> ]Cl)   |                    | Poly([Pyr <sub>11</sub> ][Hex]) |                    |
|-------------------------------------|--------------------|--------------------------------|--------------------|---------------------------------|--------------------|
| Medium M <sub>w</sub> (200–350 kDa) |                    | Low M <sub>w</sub> (< 100 kDa) |                    | M <sub>w</sub> = 53 kDa         |                    |
| 100 w <sub>1</sub>                  | 100 w <sub>2</sub> | 100 w <sub>1</sub>             | 100 w <sub>2</sub> | 100 w <sub>1</sub>              | 100 w <sub>2</sub> |
| 28.0804                             | 6.3072             | 27.4065                        | 7.1018             | 33.4319                         | 5.4320             |
| 25.5056                             | 7.5317             | 25.4169                        | 7.8315             | 31.1727                         | 6.3029             |
| 23.6835                             | 8.4730             | 23.3960                        | 8.8055             | 29.2123                         | 7.0147             |
| 22.1401                             | 9.2245             | 21.1792                        | 10.0928            | 27.4774                         | 7.6531             |
| 20.4171                             | 9.9699             | 19.7409                        | 10.8721            | 26.2518                         | 7.8902             |
| 18.7790                             | 10.8067            | 18.4385                        | 11.6105            | 25.1050                         | 8.5309             |
| 17.1123                             | 11.9289            | 17.1289                        | 12.5842            | 24.2942                         | 8.7540             |
| 16.0596                             | 12.4389            | 15.2265                        | 13.6780            | 23.2578                         | 9.2987             |
| 14.8766                             | 13.2595            | 13.0583                        | 15.0552            | 22.1119                         | 9.7388             |
| 13.3804                             | 14.3868            | 11.7321                        | 16.0789            | 20.6702                         | 10.6775            |
| 11.9669                             | 15.2181            | 10.4187                        | 17.1103            | 19.4208                         | 10.9106            |
| 11.0020                             | 15.9985            | 9.5497                         | 17.8319            | 18.5079                         | 11.4175            |
| 9.8745                              | 16.9520            | 8.7117                         | 18.6504            | 17.7499                         | 11.7460            |
| 8.7849                              | 17.8502            | 7.4660                         | 19.7302            | 16.8723                         | 12.3133            |
| 7.9404                              | 18.6015            | 6.6567                         | 20.5798            | 16.1797                         | 12.6817            |
| 7.1880                              | 19.3276            | 6.0333                         | 21.2744            | 15.5120                         | 13.0355            |
| 6.3646                              | 20.2068            | 5.0364                         | 22.4768            | 14.6703                         | 13.5454            |
| 5.4585                              | 21.2498            | 3.7428                         | 24.2894            | 13.8179                         | 13.9930            |
| 4.4784                              | 22.5157            | 2.8569                         | 25.8212            | 13.1396                         | 14.4006            |
| 3.6918                              | 23.6931            | 2.3227                         | 26.9320            | 12.5304                         | 14.7101            |
| 3.1105                              | 24.6746            | 1.8704                         | 27.9495            | 12.0027                         | 15.0169            |
| 2.5726                              | 25.6230            | 1.3977                         | 29.4635            | 11.3467                         | 15.4919            |
| 2.0376                              | 26.7827            | -                              | -                  | 10.5947                         | 15.9475            |
| 1.4612                              | 28.3001            | -                              | -                  | 9.7573                          | 16.4706            |
| -                                   | -                  | -                              | -                  | 8.7911                          | 17.1887            |
| -                                   | -                  | -                              | -                  | 7.7706                          | 17.9594            |
| -                                   | -                  | -                              | -                  | 6.9835                          | 18.5629            |
| -                                   | -                  | -                              | -                  | 6.3134                          | 19.0761            |
| -                                   | -                  | -                              | -                  | 5.7100                          | 19.5988            |

|                                 |                    |                                 |                    |        |         |
|---------------------------------|--------------------|---------------------------------|--------------------|--------|---------|
| -                               | -                  | -                               | -                  | 5.1167 | 20.2240 |
| -                               | -                  | -                               | -                  | 4.5542 | 20.7250 |
| -                               | -                  | -                               | -                  | 3.9381 | 21.4057 |
| -                               | -                  | -                               | -                  | 3.1403 | 22.4014 |
| -                               | -                  | -                               | -                  | 2.6903 | 23.0655 |
| -                               | -                  | -                               | -                  | 2.2803 | 23.7447 |
| -                               | -                  | -                               | -                  | 1.8873 | 24.5169 |
| Poly([Pyr <sub>11</sub> ][Adi]) |                    | Poly([Pyr <sub>11</sub> ][Cit]) |                    |        |         |
| Mw = 50 kDa                     |                    | Mw = 31 kDa                     |                    |        |         |
| 100 w <sub>1</sub>              | 100 w <sub>2</sub> | 100 w <sub>1</sub>              | 100 w <sub>2</sub> |        |         |
| 16.2146                         | 16.2602            | 9.4685                          | 27.8959            |        |         |
| 15.1523                         | 16.5998            | 8.4626                          | 28.2809            |        |         |
| 14.1028                         | 16.7876            | 7.8686                          | 28.5673            |        |         |
| 13.2847                         | 17.0620            | 7.2712                          | 28.8307            |        |         |
| 12.4588                         | 17.2050            | 6.7639                          | 29.0353            |        |         |
| 11.1991                         | 17.6956            | 6.3972                          | 29.1983            |        |         |
| 9.3271                          | 18.4763            | 5.8366                          | 29.4870            |        |         |
| 7.9456                          | 18.9798            | 5.0251                          | 29.9689            |        |         |
| 6.8789                          | 19.6499            | 4.3260                          | 30.4141            |        |         |
| 5.8598                          | 20.3072            | 3.8578                          | 30.7657            |        |         |
| 4.9019                          | 20.9270            | 3.5230                          | 31.0061            |        |         |
| 3.9267                          | 21.8240            | 3.1336                          | 31.3298            |        |         |
| 2.9797                          | 22.9269            | 2.6640                          | 31.7649            |        |         |
| 2.1761                          | 24.2171            | 2.2285                          | 32.2239            |        |         |
| 1.5420                          | 25.5190            | 1.9158                          | 32.6041            |        |         |
| 1.0659                          | 26.9295            | 1.6502                          | 32.9566            |        |         |
| 0.7195                          | 28.1532            | 1.4225                          | 33.3210            |        |         |
| -                               | -                  | 1.1701                          | 33.7333            |        |         |
| -                               | -                  | 0.8549                          | 34.3658            |        |         |

**Table S2.** Weight fraction data for the ternary systems composed of poly([Pyr<sub>11</sub>]Cl) high M<sub>w</sub> (400–500 kDa) (1) + K<sub>3</sub>PO<sub>4</sub> (2) + H<sub>2</sub>O (3) at 40 °C and 50 °C.

| Poly([Pyr <sub>11</sub> ]Cl)<br>40 °C |                    | Poly([Pyr <sub>11</sub> ]Cl)<br>50 °C |                    |
|---------------------------------------|--------------------|---------------------------------------|--------------------|
| 100 w <sub>1</sub>                    | 100 w <sub>2</sub> | 100 w <sub>1</sub>                    | 100 w <sub>2</sub> |
| 26.0203                               | 8.7972             | 26.3240                               | 9.2903             |
| 24.3447                               | 9.4210             | 24.2191                               | 10.3755            |
| 22.3937                               | 10.5640            | 21.5039                               | 11.3209            |
| 20.4943                               | 11.2979            | 20.0747                               | 12.0556            |
| 18.8006                               | 12.3349            | 18.5554                               | 13.0256            |
| 17.5516                               | 12.9834            | 17.1118                               | 13.7603            |
| 16.4738                               | 13.7424            | 15.9488                               | 14.5412            |
| 15.4574                               | 14.3025            | 14.9763                               | 15.1714            |
| 14.6820                               | 14.7578            | 14.0864                               | 15.7337            |
| 13.9325                               | 15.2505            | 13.6405                               | 15.9533            |
| 13.2139                               | 15.7357            | 12.4914                               | 16.6140            |
| 12.2814                               | 16.3693            | 10.8497                               | 18.0426            |
| 10.5734                               | 17.6728            | 9.5972                                | 19.0802            |
| 9.1872                                | 18.8952            | 8.7112                                | 19.8904            |
| 8.1092                                | 19.9785            | 7.9455                                | 20.6774            |
| 7.4815                                | 20.5826            | 7.1256                                | 21.5504            |
| 6.2985                                | 21.6968            | 6.4991                                | 22.2353            |
| 5.2284                                | 22.9240            | 5.8385                                | 23.0930            |
| 3.9837                                | 24.7486            | 5.0986                                | 24.0146            |
| 3.2152                                | 26.1229            | 4.4151                                | 24.9874            |
| 2.6891                                | 27.0787            | 3.6926                                | 26.1375            |
| -                                     | -                  | 2.8772                                | 27.5851            |
